# Supplementary material for: Considerations for assessing the feasibility of network meta-analysis of seasonal vaccines
Source: Atypon-hosted journal article supplement (doi:10.57264/cer-2026-0014), 2026-06-29
Supplement: supplementary materials.docx [file supplementary%20materials.docx]

**Supplementary Material**

**Supplementary Table 1. Pros and Cons Associated with Each Network Scenario**

| **Scenario** | **Rationale / Pros** | **Cons** |
| --- | --- | --- |
| **Scenario A:** Network assessing vaccines separately based on product, platform, and strain with placebo/no recent vaccine as common comparator | 1. Includes all studies | 1. Placebo/no (recent) vaccine group introduces effect modification by season à high risk of bias 2. Assumes equivalence among placebo, no vaccine, and no recent vaccine à potential risk of bias |
| **Scenario B:** Network assessing vaccines separately based on product, platform, and strain without common comparator | 1. Removes placebo/no (recent) vaccine group to minimize bias | 1. Limits the network |
| **Scenario C:** Network assessing vaccines separately based on platform and strain | 1. Removes placebo/no (recent) vaccine group to minimize bias 2. Allows network connections to key vaccines | 1. Assumes equivalence by product 2. Limits the network |
| **Scenario D:** Network assessing vaccines targeting the same season/strain separately based on product, platform, and strain with placebo/no recent vaccine as common comparator | 1. Removes vaccines/seasons with Strain A to minimize bias | 1. Limits the network 2. Assumes equivalence among placebo, no vaccine, and no recent vaccine à potential risk of bias |
